# Supplementary material
Source: HighWire-hosted journal article supplement (http://bmjopenquality.bmj.com/highwire/filestream/141207/field_highwire_adjunct_files/0/bmjoq-2020-001047supp001_data_supplement.pdf)
Supplement: bmjoq-2020-001047supp001_data_supplement.pdf [file bmjoq-2020-001047supp001_data_supplement.pdf]

## Appendix 1 Focus group topic guide

### Welcome, introductions and consent

#### Reasons for undertaking the module

- How did you hear about the course?
- What motivated you to register?
- What were your thoughts and feelings as you embark upon this course?

#### Role of the LPCs

- What communication, if any, did you have with the LPC and did this influence your decision to take the QI module?
- Would you have undertaken the QI module if the LPC had not been involved?

#### Experience of the module and impact on practice (if any)

- Discuss barriers and facilitators to undertaking postgraduate training
- What did you learn and how has it impacted on your practice?
- In what ways, if any, has this improved patient care?

Thank participants for their time.
